# Supplementary material for: Synthesis, characterization, thermal properties and antiproliferative potential of copper(ii) 4′-phenyl-terpyridine compounds
Source: Royal Society of Chemistry journal article supplement (doi:10.1039/c5dt02744f), 2016-01-01
Supplement: c5dt02744f1.pdf [file c5dt02744f1.pdf]

## Electronic Supplementary Material

### Synthesis, Characterization, Thermal Properties and Antiproliferative Potential of Copper(II) 4'-phenyl-terpyridine Compounds

Zhen Ma,<sup>a,b</sup>\* Bian Zhang,<sup>a</sup> M. Fátima C. Guedes da Silva,<sup>b</sup>\* Joana Silva,<sup>c</sup> Ana Soraia Mendo,<sup>c</sup>  
Pedro Viana Baptista,<sup>c</sup> Alexandra R. Fernandes,<sup>b,c</sup>\* Armando J.L. Pombeiro<sup>b</sup>

<sup>a</sup> Guangxi Key Laboratory of Petrochemical Resource Processing and Process Intensification Technology, School of Chemistry and Chemical Engineering, Guangxi University, Nanning 530004, P. R. China, [mzmzfll0090@sina.com](mailto:mzmzfll0090@sina.com)

<sup>b</sup> Centro de Química Estrutural, Complexo I, Instituto Superior Técnico, Universidade de Lisboa, Av. Rovisco Pais, 1049-001, Lisboa, Portugal, E-mail: [fatima.guedes@tecnico.ulisboa.pt](mailto:fatima.guedes@tecnico.ulisboa.pt)

<sup>c</sup> UCIBIO, Departamento de Ciências da Vida, Faculdade de Ciências e Tecnologia, Universidade Nova de Lisboa, Caparica, Portugal, E-mail: [ma.fernandes@fct.unl.pt](mailto:ma.fernandes@fct.unl.pt)

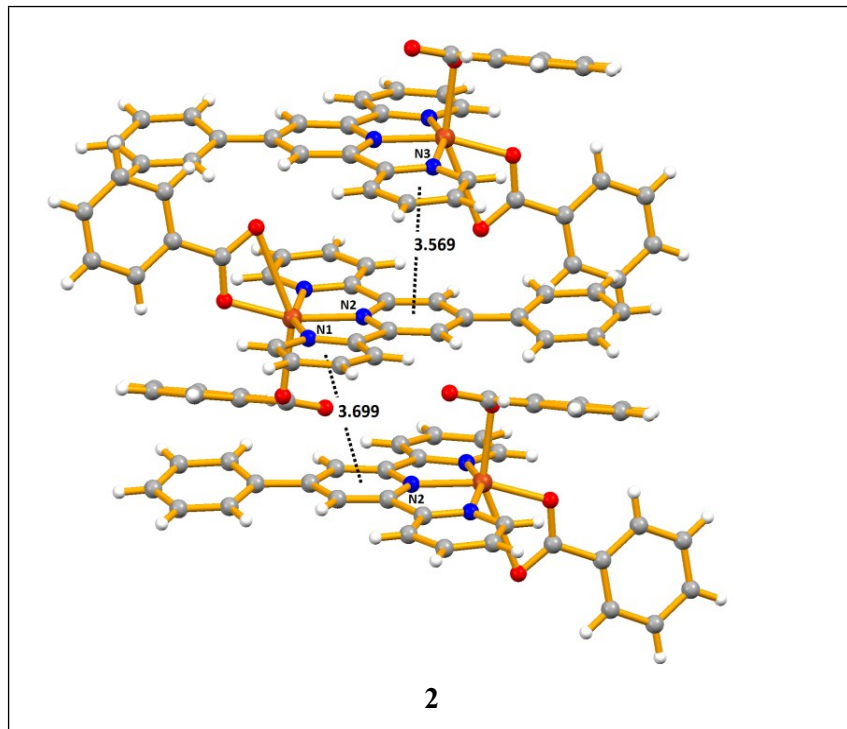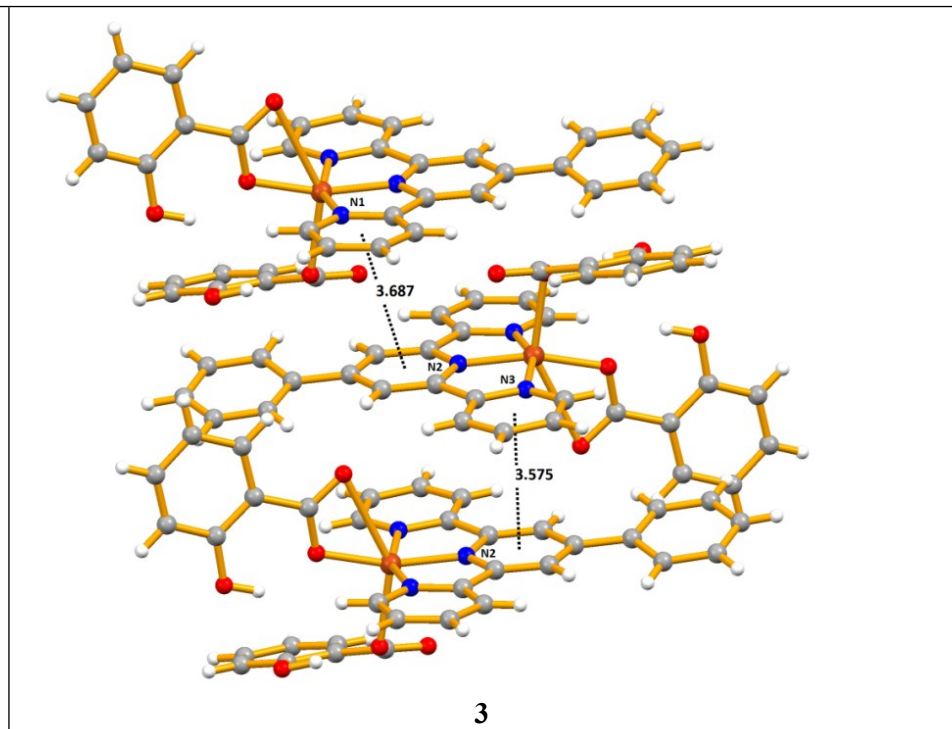

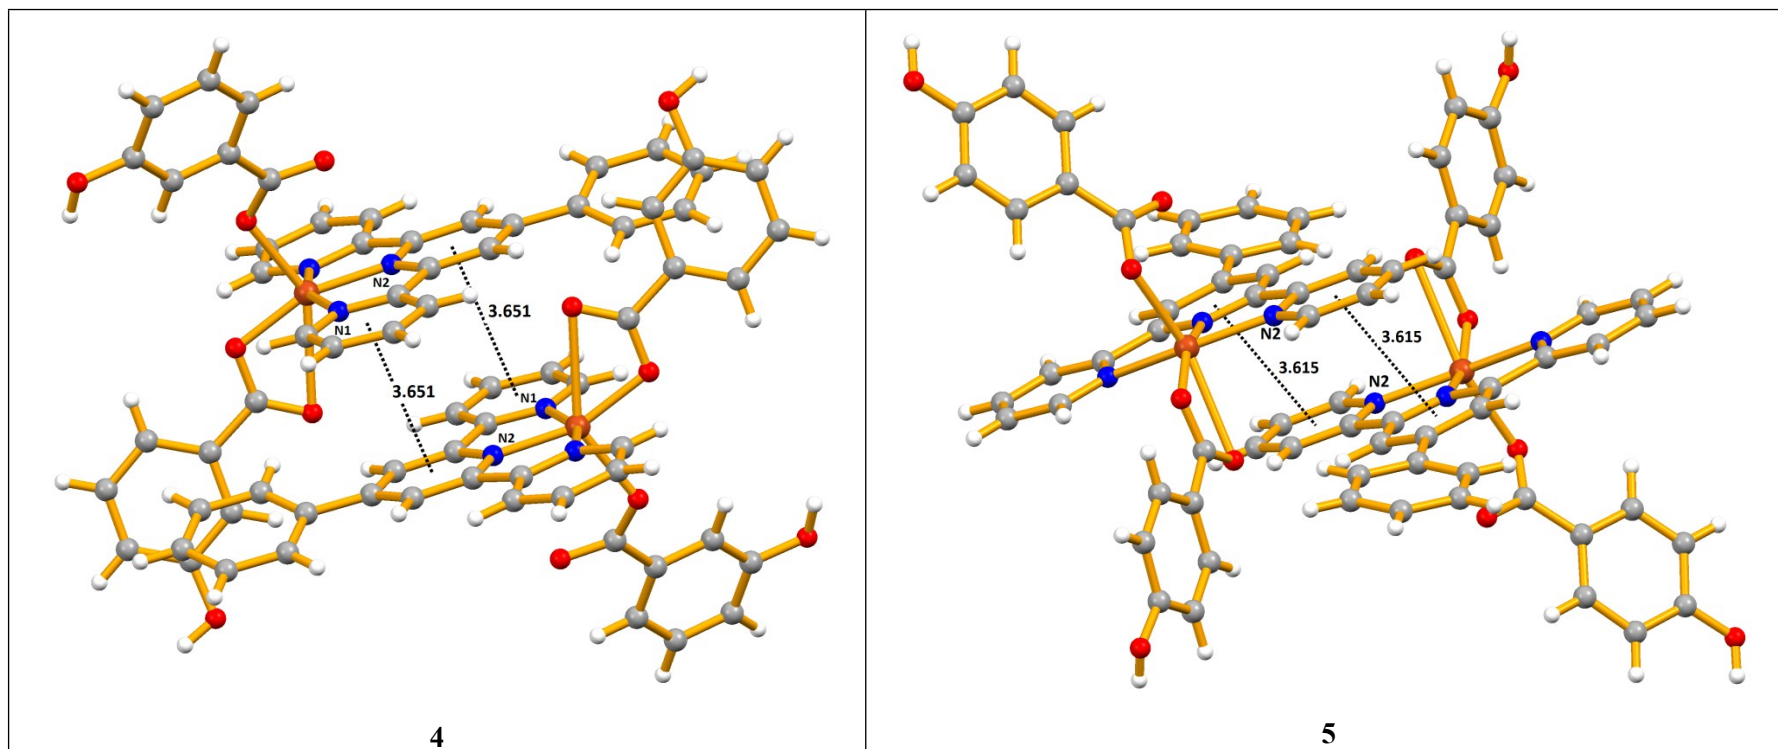

Figure S1 - Fragment of the crystal packing diagrams of **2** – **5** showing the  $\pi \cdots \pi$  interactions between the pyridyl rings.

Table S1. Hydrogen bond geometry [ $\text{\AA}$ ,  $^\circ$ ] in **1** and **3 – 5**.

| D–H $\cdots$ A      | $d(\text{H}\cdots\text{A})$ | $d(\text{D}\cdots\text{A})$ | $\angle(\text{D}–\text{H}\cdots\text{A})$ | Symmetry codes  |
|---------------------|-----------------------------|-----------------------------|-------------------------------------------|-----------------|
| <b>1</b>            |                             |                             |                                           |                 |
| O1–H1A $\cdots$ O6  | 1.90                        | 2.741(2)                    | 172                                       | -1+x,y,-1+z     |
| O1–H1B $\cdots$ O5  | 2.02                        | 2.852(2)                    | 165                                       | x,1/2-y,-1/2+z  |
| O2–H2A $\cdots$ O8  | 1.93                        | 2.680(2)                    | 146                                       | -1+x,y,-1+z     |
| O2–H4B $\cdots$ O4  | 1.78                        | 2.616(2)                    | 166                                       | <i>intra</i>    |
| <b>3</b>            |                             |                             |                                           |                 |
| O5–H5O $\cdots$ O3  | 1.82(4)                     | 2.584(3)                    | 139(4)                                    | <i>intra</i>    |
| O6–H6O $\cdots$ O1  | 1.68(3)                     | 2.549(3)                    | 160(5)                                    | <i>intra</i>    |
| <b>4</b>            |                             |                             |                                           |                 |
| O5–H5O $\cdots$ O7  | 1.82(3)                     | 2.723(2)                    | 174(3)                                    | 1-x,-y,-z       |
| O6–H6O $\cdots$ O2  | 1.73(2)                     | 2.601(2)                    | 166(2)                                    | -1+x,-1+y,z     |
| O7–H7O $\cdots$ O1  | 1.87(3)                     | 2.747(2)                    | 166(2)                                    |                 |
| <b>5</b>            |                             |                             |                                           |                 |
| O5–H5E $\cdots$ O3  | 1.87                        | 2.671(2)                    | 165                                       | 1-x,1/2+y,1/2-z |
| O6–H16E $\cdots$ O4 | 1.77                        | 2.618(3)                    | 176                                       | -x,-1/2+y,1/2-z |

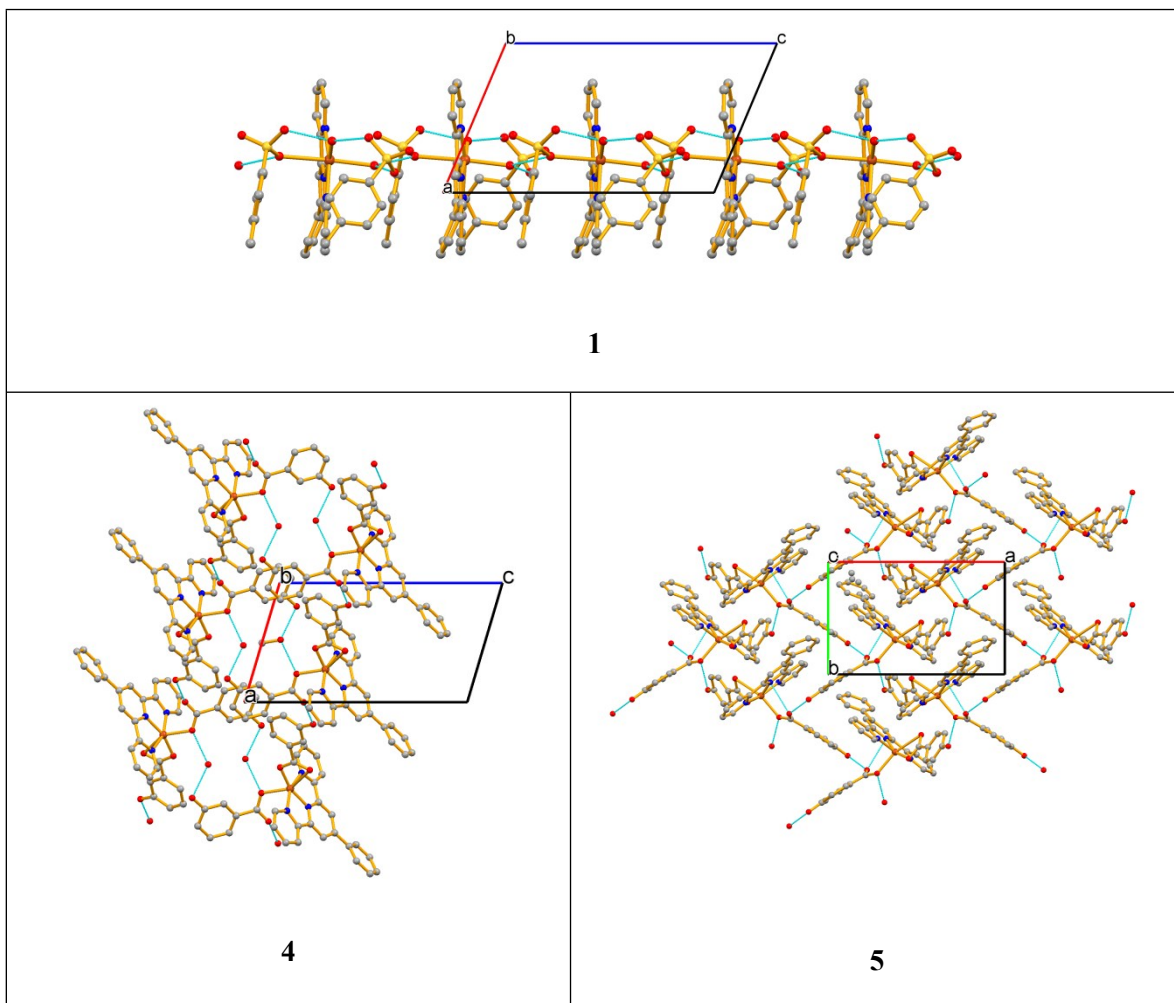

Figure S2 – Hydrogen bond interactions (in dashed light blue lines) leading to infinite one-dimensional chains (in compounds **1** and **4**) and to an infinite two-dimensional network (in compound **5**).

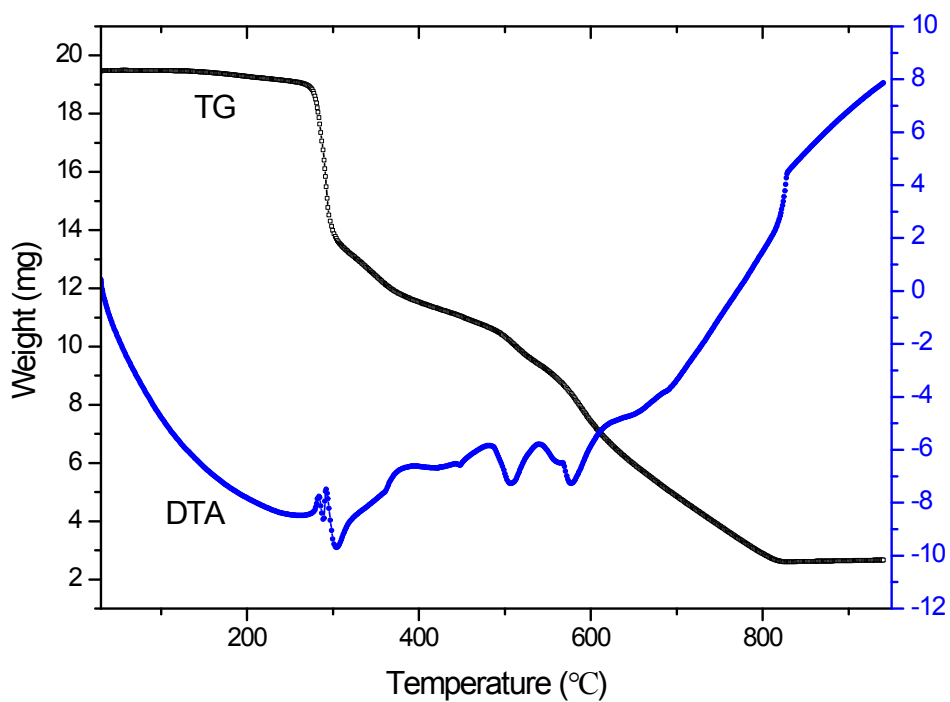

Figure S3 – Thermal analyses (TG and DTA plots) for complex 3.

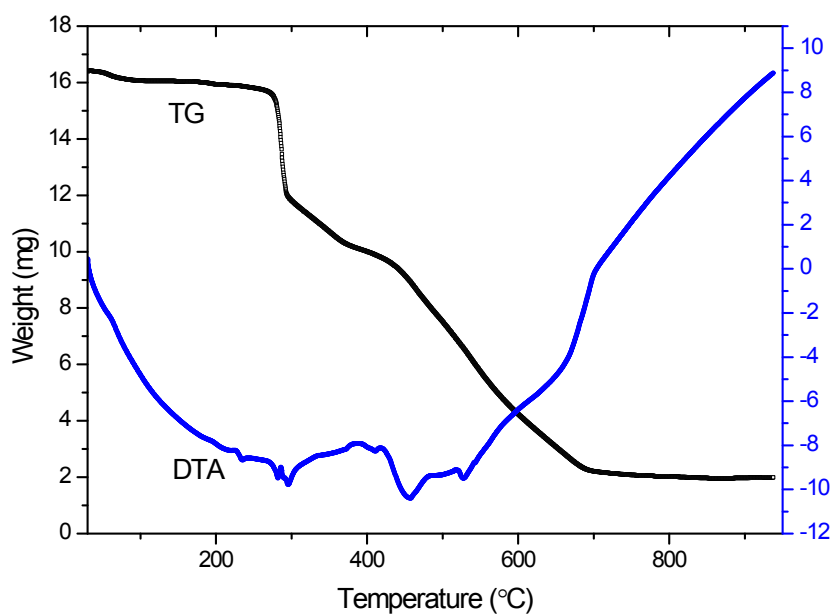

Figure S4 – Thermal analyses (TG and DTA plots) of complex 4.

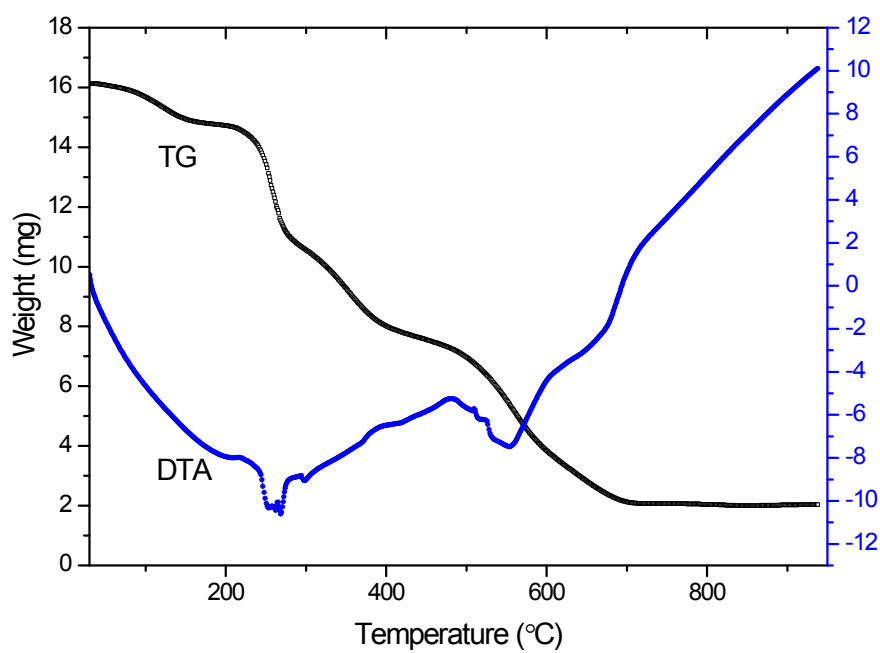

Figure S5 – Thermal analyses (TG and DTA plots) of complex 5.

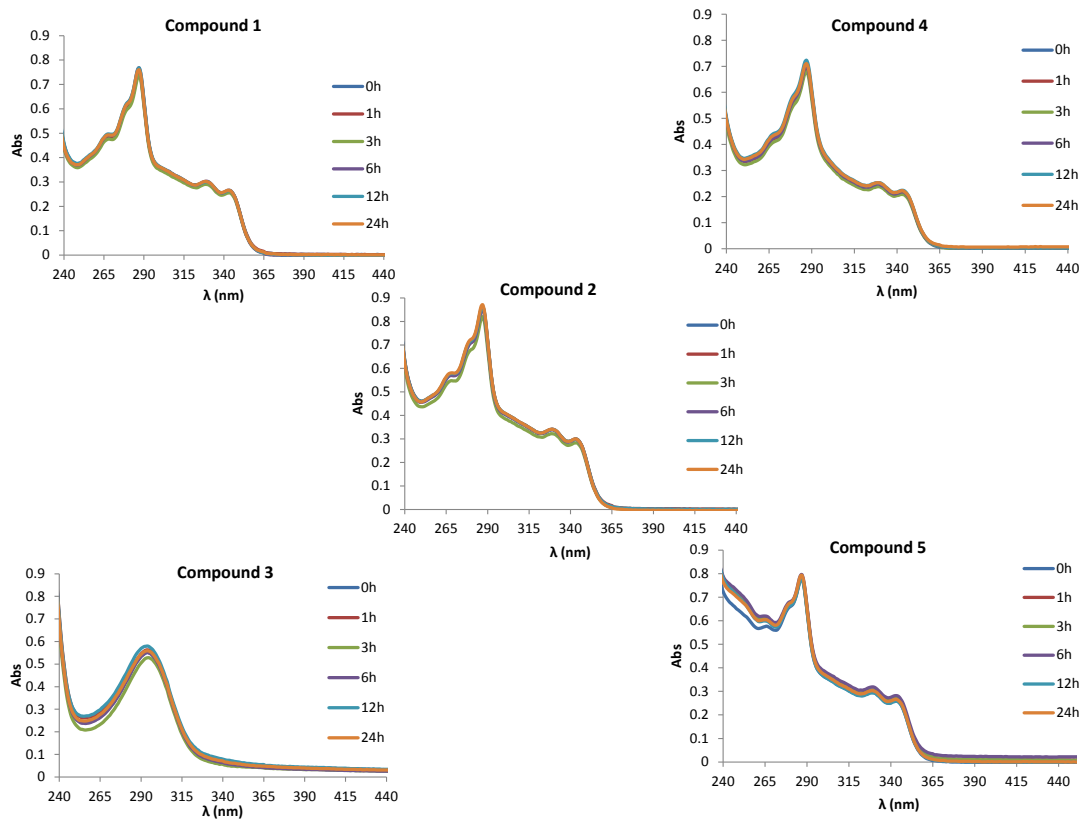

Figure S6- UV spectra of compounds **1-5** incubated (20  $\mu$ M) for 1, 3, 6, 12 and 24 h in PBS at 37  $^{\circ}$ C.



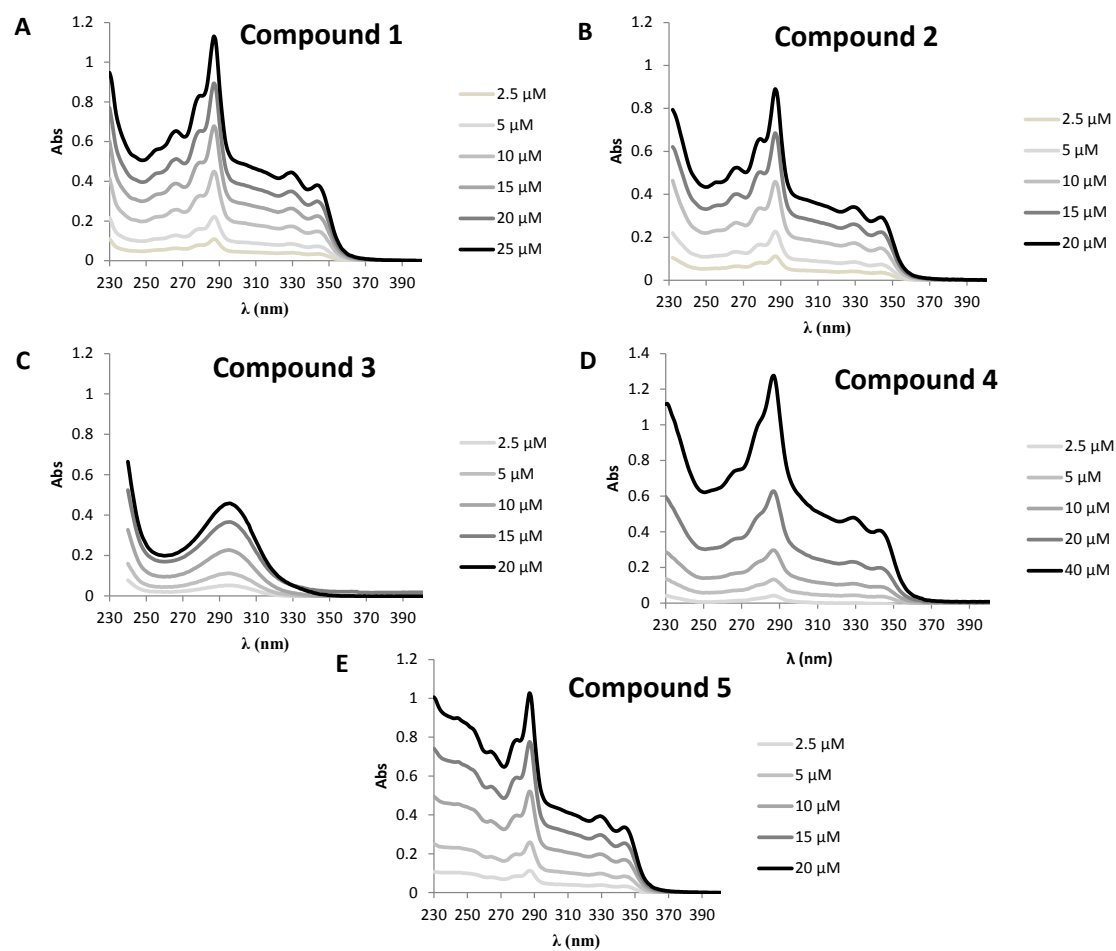

**Figure S7-** UV spectra of increasing concentrations of compounds **1-5** (2.5 - 40  $\mu\text{M}$ ) incubated for 24 h in buffer 5 mM Tris-HCl, 50 mM NaCl (pH 7.2) at 37  $^{\circ}\text{C}$ . Spectra were used for calculating  $\epsilon_f$ , the extinction coefficient for the free compound.
